# Supplementary material
Source: publisher figshare collection journal article supplement (https://gsajournals.figshare.com/ndownloader/files/29162184)
Supplement: Supplementary file 1 [file 29162184]

## Sheet: Info
Trait	Description
FLW	days to flowering
HGH	plant height, in cm
FBY	fresh biomass yield, in t/ha
JUC	juice extraction yield, in %
BRX	total soluble solids, in °Brix
SUC	sucrose content, in %
RSU	reducing sugar content, in %
FIB	fibers, in %
Trial	Year
T1	2010
T2	2011/12
T3	2013/14
Abbreviation	Description
MIM	multiple interval mapping
MT-MIM	multi-trial multiple interval mapping
SI	~95% support interval
100-kbp	window size of 100 kbp
200-kbp	window size of 200 kbp
Physical positions
S. bicolor v2.1

## Sheet: Overlap
Trait	Chromosome	Genetic map						Physical map
		MT-MIM			MIM			MT-MIM
		Peak	Lower SI	Upper SI	T1	T2	T3	100-kbp	200-kbp
FLW	1	11093514	1488613	46926393	11093514		6769175	3970020	3970020
		71594007	64543579	73162697	71137208	71735799		65286796	65286796
	4							60384430	60384430
	6	382696	72086	1877631	478358	382696		556374	556374
		4049408	3353216	44775911	42608083	9758862	42410798	40503618	40503618
	8							32219639	32219639
	10	53882121	9396641	60776451	59178160	52939284	53882121	46359419	46359419
HGH	1	64727343	57642472	73162697	64713799	66568607		67145124	67145124
	3	69453408	58927642	73490974			68255519	68228805	68228805
	5				4015584
					55245643
	6	44949491	4461172	46980612		46121015		42204455	42204455
	8						51087042
	9	49204605	6400841	50563471	47849274	46945823	49406423	10163280	10163280
	10	48678282	11152492	55718711	54145911	48678282	6818305	36250174	36250174
FBY	1						3539875
		73162697	67225475	73162697	73162697			66869596	66869596
	5				59749942	59611128
	6	46121015	40756181	48859414		44949491	47603323	40060810	40060810
	9							2964966	2964966
	10	48678282	11152492	55718711	54145911	48678282	48678282	32791595	32791595
JUC	1	1581214	1488613	17004483		1488613		6473213	6473213
	3						57119549	47721891	47721891
	5							4780572	4780572
								56630015	56630015
	6	48478843	44880697	52444230				46177115	46177115
	9	48103357	6688280	51903322		45733774		10123156	10123156
	10							20145976	20145976
BRX	1	1581214	1488613	12231313	2709413	10456593	1488613	6547553	6554130
								66361162	66179567
	3							16987709	32929037
		65279548	57615114	68975069	65704227	65704227	58248425	68076002	66439364
	4								20858301
	5							4818854	3332301
	6	42731400	3291777	48188868				12197160	12197160
		52779223	48417634	54328118		45896613	52779223	52508321	52508321
	8								45414023
	9							2517024	2961942
		49406423	5086107	50629519	50079241	45599604	49364182	46360231	47191574
	10				6818305
SUC	1	2709413	1488613	13328163	11093514	11093514	1488613	6530322	1922310
								63062369	63062369
	3							15899426	15556960
		58433131	56563015	65449742	62645903	61722987	58248425	66807772	66807772
	4							63077574	63077574
	6	45898926	42205320	48842871				43234162	43234162
		54328118	48478843	54328118		46121015	54328118	53529156
	9	49406423	6400841	50563471	49508522	45733774	49364182	10123156	9924409
	10				6818305
RSU	1	1553727	1488613	12231313	13073249	12231313	2323372	6530322	6821255
	3							13202292	45235825
		57882869	51475263	60809311	58248425		57923290	66392583	66810353
	4	273007	273007	5458463	273007			439184	439184
	6							42000837	42000837
								53464838
	9							44079556
FIB	1				11093514
								58990711	58990711
	3	73490974	64804875	73490974		73490974	72144491	66431004	66431004
	6	45740799	2314521	53529089				34859585	34859585
	8							8319850	8319850
		52308546	41693281	55244689		50697004	52308546
	9	6770591	84197	53410344				10123156	10123156
	10				60464098
